# Supplementary material for: Help-Seeking from a National Youth Helpline in Australia: An Analysis of Kids Helpline Contacts
Source: MDPI journal article supplement (doi:10.3390/ijerph18116024), 2021-06-03
Supplement: s1 [file s1]

**Supplementary Table S1.** Descriptive statistics of the duration (in minutes) of phone counselling (n=260,513) and information and referral (n=207,113) contacts.

| Year      | Counselling |        |       |         |                                            | Information and Referral |        |       |         |                                                         |
|-----------|-------------|--------|-------|---------|--------------------------------------------|--------------------------|--------|-------|---------|---------------------------------------------------------|
|           | Mean        | Median | SD    | N       | Total counselling contact minutes per year | Mean                     | Median | SD    | N       | Total information and referral contact minutes per year |
| 2012      | 36.69       | 33.38  | 23.14 | 44,253  | 1,496,923.52                               | 7.27                     | 1.92   | 14.65 | 47,693  | 346,592.98                                              |
| 2013      | 36.01       | 32.55  | 22.60 | 41,811  | 1,403,994.43                               | 7.88                     | 2.27   | 15.51 | 39,003  | 307,148.63                                              |
| 2014      | 35.37       | 32.40  | 21.63 | 42,002  | 1,397,377.44                               | 6.55                     | 2.05   | 13.73 | 32,974  | 216,062.14                                              |
| 2015      | 34.23       | 31.00  | 21.30 | 41,852  | 1,348,489.45                               | 5.36                     | 1.85   | 11.65 | 27,370  | 146,580.04                                              |
| 2016      | 34.81       | 31.72  | 21.64 | 37,092  | 1,220,004.06                               | 5.55                     | 2.28   | 11.01 | 21,765  | 120,890.07                                              |
| 2017      | 35.91       | 33.17  | 21.61 | 36,331  | 1,245,122.29                               | 6.32                     | 2.60   | 12.24 | 21,465  | 135,723.20                                              |
| 2018      | 35.43       | 32.67  | 21.01 | 33,857  | 1,137,593.08                               | 6.39                     | 2.72   | 11.78 | 16,843  | 107,674.49                                              |
| 2012-2018 | 35.51       | 32.40  | 21.91 | 260,513 | 9,249,514.07                               | 6.67                     | 2.18   | 13.53 | 207,113 | 1,380,580.74                                            |

\*Average for mean, median and SD; total for n and counselling minutes.

\*\*All included counselling contacts made by phone were 60 seconds or greater.

**Supplementary Table S2.** Descriptive statistics of the duration (in minutes) of webchat counselling (n=118,332) and information and referral (n=24,488) contacts.

| Year      | Counselling |        |       |        |                                            | Information and referral |        |       |        |                                                         |
|-----------|-------------|--------|-------|--------|--------------------------------------------|--------------------------|--------|-------|--------|---------------------------------------------------------|
|           | Mean        | Median | SD    | N      | Total counselling contact minutes per year | Mean                     | Median | SD    | N      | Total information and referral contact minutes per year |
| 2012      | 61.25       | 63     | 23.10 | 9022   | 552,597.50                                 | 21.08                    | 11.5   | 23.01 | 1,358  | 28,626.64                                               |
| 2013      | 57.79       | 61     | 21.28 | 12933  | 747,398.07                                 | 18.05                    | 9      | 21.06 | 2,656  | 47,940.80                                               |
| 2014      | 53.39       | 57     | 21.42 | 13915  | 742,921.85                                 | 15.05                    | 9      | 17.68 | 3,161  | 47,573.05                                               |
| 2015      | 51.74       | 55     | 22.28 | 16240  | 840,257.60                                 | 12.15                    | 8      | 15.01 | 3,447  | 41,881.05                                               |
| 2016      | 50.58       | 54     | 22.86 | 19402  | 981,353.16                                 | 10.95                    | 7      | 13.77 | 3,857  | 42,234.15                                               |
| 2017      | 50.81       | 53     | 23.28 | 20969  | 1,065,434.89                               | 11.27                    | 7      | 13.97 | 4,062  | 45,778.74                                               |
| 2018      | 50.61       | 53     | 21.86 | 24077  | 1,218,536.97                               | 10.79                    | 6      | 14.68 | 4,900  | 52,871.00                                               |
| 2012-2018 | 52.75       | 56     | 22.58 | 116558 | 6,148,434.50                               | 13.09                    | 8      | 16.61 | 23,441 | 306,842.69                                              |

\*average for mean, median and SD; total for n and counselling minutes.

**Supplementary Table S3.** Counselling concern trends across each medium in 2012-2018 (total n=449,814).

|                                                | Phone counselling concerns<br>(n=260,513) |            |            |                 | Webchat counselling concerns<br>(n=116,558) |            |            |                 | Email counselling concerns<br>(n=72,743) |        |        |                 |
|------------------------------------------------|-------------------------------------------|------------|------------|-----------------|---------------------------------------------|------------|------------|-----------------|------------------------------------------|--------|--------|-----------------|
|                                                | APC                                       | LL         | UL         | <i>p</i> -value | APC                                         | LL         | UL         | <i>p</i> -value | APC                                      | LL     | UL     | <i>p</i> -value |
| <b>Emotional wellbeing &amp; mental health</b> | -0.95                                     | -2.70      | 0.80       | .227            | 17.04                                       | 13.20      | 21.00      | <.001           | -13.58                                   | -18.30 | -8.60  | .001            |
| Emotional wellbeing                            | 0.90                                      | -2.80      | 4.70       | .564            | 15.40                                       | 7.80       | 23.60      | .003            | -13.04                                   | -18.90 | -6.80  | .004            |
| Loss & grief                                   | 1.29                                      | -19.60     | 27.60      | .893            | 6.13                                        | 1.20       | 11.30      | .024            | -18.99                                   | -25.40 | -12.00 | .001            |
| Mental health concerns                         | -0.83                                     | -2.80      | 1.20       | .342            | 17.84                                       | 13.40      | 22.45      | <.001           | -12.48                                   | -18.60 | -5.90  | .005            |
| Self-injury/self-harm concerns                 | -5.83                                     | -9.00      | -2.60      | .006            | 9.98                                        | 4.10       | 16.20      | .007            | -30.84                                   | -57.30 | 11.90  | .106            |
| Suicide-related concerns                       | 0.86                                      | -2.90      | 4.80       | .588            | 21.61                                       | 14.80      | 28.80      | <.001           | -12.80                                   | -18.80 | -6.30  | .004            |
| <b>Family relationships</b>                    | -5.22                                     | -8.00      | -2.30      | .006            | 13.50                                       | 10.50      | 16.60      | <.001           | -14.10                                   | -19.00 | -8.90  | <.05            |
| 2012-2015                                      | <i>n/a</i>                                | <i>n/a</i> | <i>n/a</i> | <i>n/a</i>      | <i>n/a</i>                                  | <i>n/a</i> | <i>n/a</i> | <i>n/a</i>      | -19.52                                   | -32.90 | -3.40  | .036            |
| 2015-2018                                      | <i>n/a</i>                                | <i>n/a</i> | <i>n/a</i> | <i>n/a</i>      | <i>n/a</i>                                  | <i>n/a</i> | <i>n/a</i> | <i>n/a</i>      | -8.39                                    | -23.70 | 9.90   | .175            |
| Child-parent relationships                     | -4.73                                     | -7.80      | -1.50      | .013            | 13.62                                       | 10.20      | 17.20      | <.001           | -13.64                                   | -17.90 | -9.20  | .001            |
| Changing family structures                     | -5.05                                     | -8.90      | -1.10      | .023            | 14.81                                       | 9.70       | 20.10      | .001            | -14.61                                   | -16.90 | -12.20 | <.001           |
| Other family relationships                     | -6.98                                     | -10.90     | 2.90       | .008            | 10.87                                       | 7.00       | 14.80      | .001            | -15.89                                   | -19.80 | -11.80 | <.001           |
| Parenting own children                         | -13.02                                    | -20.70     | -4.60      | .012            | 0.08                                        | -12.60     | 14.60      | .988            | -21.06                                   | -34.30 | -5.10  | .021            |
| <b>Social relationships</b>                    | 1.55                                      | -33.40     | 54.90      | .929            | 10.18                                       | 5.90       | 14.60      | .002            | -18.86                                   | -22.90 | -14.60 | .001            |
| Friend/peer relationships                      | -6.76                                     | -10.40     | -3.00      | .006            | 10.35                                       | 6.30       | 14.60      | .001            | -16.57                                   | -20.40 | -12.60 | <.001           |
| Dating & partner relationships                 | -5.46                                     | -8.40      | -2.40      | .006            | 19.94                                       | 1.10       | 42.30      | .041            | -22.73                                   | -28.50 | -16.40 | <.001           |
| <b>Identity &amp; self-concept</b>             | -7.27                                     | -9.30      | -5.20      | <.001           | 8.05                                        | 2.10       | 14.40      | .017            | -8.55                                    | -44.80 | 51.50  | .668            |
| Body image                                     | -10.60                                    | -15.10     | -5.80      | .003            | 9.30                                        | 3.60       | 15.30      | .008            | -20.38                                   | -28.50 | -11.40 | .003            |
| Cultural identity                              | -6.76                                     | -12.60     | -0.50      | .040            | 9.90                                        | -4.40      | 26.30      | .141            | -13.53                                   | -30.20 | 7.10   | .142            |

|                                                 |            |            |            |            |                                         |            |            |            |                                         |            |            |            |
|-------------------------------------------------|------------|------------|------------|------------|-----------------------------------------|------------|------------|------------|-----------------------------------------|------------|------------|------------|
| Disability-related concerns                     | -6.13      | -13.70     | 2.10       | .112       | 2.18                                    | -18.30     | 27.80      | .814       | -11.10                                  | -22.30     | 1.80       | .075       |
| Gender/sex identification                       | 6.99       | -6.20      | 22.10      | .245       | 47.31                                   | 28.30      | 69.20      | .001       | 9.95                                    | -0.40      | 21.30      | .056       |
| Self-concept (global)                           | -8.19      | -11.30     | -4.90      | .001       | 2.18                                    | -5.90      | 10.90      | .530       | -17.59                                  | -27.00     | -6.90      | .009       |
| Sexual orientation                              | -8.60      | -15.30     | -1.30      | .030       | 11.42                                   | 4.10       | 19.30      | .010       | -14.75                                  | -27.00     | -4.40      | .016       |
| <b>Child abuse &amp; family violence</b>        | -4.79      | -7.60      | -1.80      | .009       | 22.72                                   | 17.10      | 28.60      | <.001      | -6.50                                   | -9.30      | -3.50      | <.05       |
| <b>2012-2014</b>                                | <i>n/a</i> | <i>n/a</i> | <i>n/a</i> | <i>n/a</i> | <i>n/a</i>                              | <i>n/a</i> | <i>n/a</i> | <i>n/a</i> | -14.71                                  | -28.20     | 1.30       | .058       |
| <b>2014-2018</b>                                | <i>n/a</i> | <i>n/a</i> | <i>n/a</i> | <i>n/a</i> | <i>n/a</i>                              | <i>n/a</i> | <i>n/a</i> | <i>n/a</i> | -2.06                                   | -7.20      | 3.40       | .242       |
| Exploitation by a family member                 | -23.13     | -52.10     | 23.40      | .213       | <i>unable to calculate due to low n</i> |            |            |            | <i>unable to calculate due to low n</i> |            |            |            |
| Emotional abuse                                 | 5.94       | 1.10       | 11.00      | .025       | 28.39                                   | 22.60      | 34.40      | <.001      | -0.85                                   | -5.60      | 4.20       | .675       |
| Living in care issues                           | -13.63     | -20.60     | -6.00      | .007       | 12.24                                   | -9.10      | 38.50      | .217       | -5.50                                   | -27.30     | 22.80      | .200       |
| Neglect of child                                | -0.42      | -3.20      | 2.40       | .716       | 28.56                                   | 11.90      | 47.70      | .006       | 10.29                                   | 0.40       | 21.20      | .044       |
| Physical abuse                                  | -2.72      | -6.50      | 1.20       | .135       | 24.16                                   | 15.40      | 33.50      | .001       | -5.07                                   | -8.10      | -1.90      | .010       |
| Sexual abuse                                    | -14.39     | -17.00     | -11.70     | <.001      | 13.46                                   | 5.90       | 21.60      | .005       | -11.78                                  | -21.20     | -1.20      | .036       |
| Exposure to family violence                     | 4.77       | -0.90      | 10.80      | .085       | 22.15                                   | 15.60      | 29.10      | <.001      | -10.39                                  | -18.20     | -1.80      | .028       |
| <b>Violence &amp; abuse (non-family)</b>        | -3.78      | -7.30      | -0.10      | .047       | 15.71                                   | 13.00      | 18.50      | <.001      | -14.12                                  | -23.30     | -3.80      | .018       |
| Bullying – school related                       | -3.48      | -8.30      | 1.60       | .137       | 16.43                                   | 13.40      | 19.60      | <.001      | -15.05                                  | -20.50     | -9.30      | .001       |
| Bullying – other                                | -1.95      | -8.90      | 5.50       | .522       | 15.79                                   | 9.80       | 22.10      | .001       | -16.43                                  | -24.30     | -7.80      | .005       |
| Dating & partner abuse                          | -3.30      | -11.00     | 5.20       | .400       | 19.94                                   | 1.10       | 42.30      | .041       | -19.59                                  | -30.20     | -7.40      | .011       |
| 2012-2016                                       | 2.81       | -11.30     | 19.20      | .505       | <i>n/a</i>                              | <i>n/a</i> | <i>n/a</i> | <i>n/a</i> | <i>n/a</i>                              | <i>n/a</i> | <i>n/a</i> | <i>n/a</i> |
| 2016-2018                                       | -14.36     | -46.30     | 36.60      | .290       | <i>n/a</i>                              | <i>n/a</i> | <i>n/a</i> | <i>n/a</i> | <i>n/a</i>                              | <i>n/a</i> | <i>n/a</i> | <i>n/a</i> |
| Sexual assault/abuse (non-family)               | -6.85      | -12.80     | -0.50      | .039       | 10.56                                   | 6.10       | 15.20      | .002       | -21.10                                  | -30.90     | -9.90      | .006       |
| Sexual harassment                               | 0.11       | -2.50      | 2.80       | .921       | 27.81                                   | 20.30      | 35.80      | <.001      | -10.38                                  | -31.30     | 16.90      | .337       |
| Harassment & assault (non-sexual)               | -4.94      | -6.80      | -3.10      | .001       | 8.50                                    | 5.00       | 12.00      | <.050      | -10.89                                  | -25.70     | 6.90       | .165       |
| 2012-2016                                       | <i>n/a</i> | <i>n/a</i> | <i>n/a</i> | <i>n/a</i> | 15.55                                   | 9.1        | 22.3       | .008       | <i>n/a</i>                              | <i>n/a</i> | <i>n/a</i> | <i>n/a</i> |
| 2016-2018                                       | <i>n/a</i> | <i>n/a</i> | <i>n/a</i> | <i>n/a</i> | -4.43                                   | -20.2      | 14.5       | .393       | <i>n/a</i>                              | <i>n/a</i> | <i>n/a</i> | <i>n/a</i> |
| <b>Offending, abusive &amp; violent actions</b> | -3.81      | -7.00      | -0.50      | .031       | 23.41                                   | 11.20      | 36.90      | .004       | -6.52                                   | -14.60     | 2.40       | .115       |
| Illegal/offending acts                          | -8.34      | -14.40     | -1.90      | .022       | 17.27                                   | 4.00       | 32.20      | .019       | -12.08                                  | -28.20     | 7.70       | .164       |

|                                                   |            |            |            |            |            |            |            |            |                                         |            |            |            |
|---------------------------------------------------|------------|------------|------------|------------|------------|------------|------------|------------|-----------------------------------------|------------|------------|------------|
| Abusive/violent actions                           | -3.55      | -36.50     | 46.40      | .833       | 33.84      | 14.90      | 56.00      | .005       | 0.80                                    | -6.10      | 8.20       | .784       |
| Sexual violence/offending acts                    | -10.84     | -16.60     | -4.70      | .007       | 18.08      | 5.10       | 32.70      | .015       | <i>unable to calculate due to low n</i> |            |            |            |
| <b>School, education &amp; work</b>               | -4.55      | -7.40      | -1.60      | .011       | 11.38      | 7.10       | 15.90      | .001       | -13.41                                  | -18.50     | -7.90      | .002       |
| School authority issue                            | -3.72      | -9.80      | 2.80       | .198       | 13.83      | 3.30       | 25.40      | .019       | -15.70                                  | -22.90     | -7.80      | .005       |
| Employment issues                                 | -1.14      | -36.50     | 53.90      | .949       | 15.43      | 8.00       | 23.40      | .003       | -15.26                                  | -24.40     | -5.00      | .014       |
| Study & education issues                          | -6.01      | -10.00     | -1.80      | .015       | 10.50      | 6.20       | 15.00      | .001       | -12.66                                  | -19.80     | -4.80      | .010       |
| <b>Potentially risky situations &amp; actions</b> | -8.22      | -9.90      | -6.50      | <.001      | 12.50      | 4.30       | 21.40      | <.050      | -14.62                                  | -20.40     | -8.50      | .002       |
| 2012-2014                                         | <i>n/a</i> | <i>n/a</i> | <i>n/a</i> | <i>n/a</i> | 27.92      | -16.10     | 95.00      | .128       | <i>n/a</i>                              | <i>n/a</i> | <i>n/a</i> | <i>n/a</i> |
| 2014-2018                                         | <i>n/a</i> | <i>n/a</i> | <i>n/a</i> | <i>n/a</i> | 5.54       | -7.60      | 20.60      | .224       | <i>n/a</i>                              | <i>n/a</i> | <i>n/a</i> | <i>n/a</i> |
| Alcohol use                                       | -5.62      | -9.80      | -1.30      | .021       | 13.45      | 6.30       | 21.10      | .004       | -16.72                                  | -23.00     | -9.90      | .002       |
| Gang/cult involvement                             | -11.15     | -31.00     | 14.50      | .284       | 20.93      | -14.80     | 71.60      | .221       | <i>unable to calculate due to low n</i> |            |            |            |
| Drug use                                          | -9.60      | -10.90     | -8.40      | <.05       | 10.90      | 1.30       | 21.30      | <.050      | -13.50                                  | -21.20     | -5.00      | .010       |
| 2012-2015                                         | -6.38      | -10.30     | -2.30      | .021       | <i>n/a</i> | <i>n/a</i> | <i>n/a</i> | <i>n/a</i> | <i>n/a</i>                              | <i>n/a</i> | <i>n/a</i> | <i>n/a</i> |
| 2015-2018                                         | -12.77     | -16.40     | -9.00      | .005       | <i>n/a</i> | <i>n/a</i> | <i>n/a</i> | <i>n/a</i> | <i>n/a</i>                              | <i>n/a</i> | <i>n/a</i> | <i>n/a</i> |
| 2012-2014                                         | <i>n/a</i> | <i>n/a</i> | <i>n/a</i> | <i>n/a</i> | 43.8       | -13        | 137.6      | .090       | <i>n/a</i>                              | <i>n/a</i> | <i>n/a</i> | <i>n/a</i> |
| 2014-2018                                         | <i>n/a</i> | <i>n/a</i> | <i>n/a</i> | <i>n/a</i> | -2.66      | -16.9      | 14.1       | .541       | <i>n/a</i>                              | <i>n/a</i> | <i>n/a</i> | <i>n/a</i> |
| Addictive behaviours (not D&A)                    | -3.40      | -12.20     | 6.20       | .392       | 15.44      | 7.50       | 24.00      | .004       | -4.91                                   | -11.60     | 2.20       | .134       |
| Physical risk-taking                              | -14.15     | -26.60     | 0.40       | .054       | -5.68      | -34.40     | 35.60      | .696       | <i>unable to calculate due to low n</i> |            |            |            |
| <b>Physical &amp; sexual health</b>               | -10.73     | -13.10     | -8.30      | <.001      | 7.16       | 3.30       | 11.20      | .005       | -19.57                                  | -26.20     | -12.30     | .001       |
| Physical or sexual development                    | -17.65     | -29.30     | -4.00      | .023       | 12.47      | 2.00       | 24.00      | .027       | -7.79                                   | -19.30     | 5.40       | .179       |
| Physical health                                   | -9.71      | -12.40     | -7.00      | <.001      | 2.87       | -2.50      | 8.50       | .232       | -20.30                                  | -28.90     | -10.70     | .004       |
| Sexual activity                                   | -9.22      | -11.60     | -6.80      | <.001      | 9.69       | -0.60      | 21.10      | .061       | -15.90                                  | -24.30     | -6.60      | .008       |
| Contraception/safe sex                            | -13.10     | -17.30     | -8.80      | <.05       | 14.30      | -19.20     | 61.70      | .400       | -39.37                                  | -49.70     | -27.00     | .001       |
| 2012-2015                                         | -7.08      | -20.10     | 8.00       | .171       | <i>n/a</i> | <i>n/a</i> | <i>n/a</i> | <i>n/a</i> | <i>n/a</i>                              | <i>n/a</i> | <i>n/a</i> | <i>n/a</i> |
| 2015-2018                                         | -18.79     | -30.20     | -5.20      | .027       | <i>n/a</i> | <i>n/a</i> | <i>n/a</i> | <i>n/a</i> | <i>n/a</i>                              | <i>n/a</i> | <i>n/a</i> | <i>n/a</i> |
| 2012-2014                                         | <i>n/a</i> | <i>n/a</i> | <i>n/a</i> | <i>n/a</i> | 92.2       | -72.10     | 1224.90    | .283       | <i>n/a</i>                              | <i>n/a</i> | <i>n/a</i> | <i>n/a</i> |
| 2014-2018                                         | <i>n/a</i> | <i>n/a</i> | <i>n/a</i> | <i>n/a</i> | -11.84     | -52.10     | 62.30      | .468       | <i>n/a</i>                              | <i>n/a</i> | <i>n/a</i> | <i>n/a</i> |

|                               |            |            |            |            |            |            |            |            |            |            |            |            |
|-------------------------------|------------|------------|------------|------------|------------|------------|------------|------------|------------|------------|------------|------------|
| Pregnancy-related concerns    | -14.16     | -18.00     | -10.10     | <.001      | 12.83      | 4.10       | 22.30      | .012       | -22.14     | -28.40     | -15.40     | .001       |
| <b>Basic needs assistance</b> | -8.80      | -13.30     | -3.90      | <.05       | 22.00      | 17.80      | 26.30      | <.050      | -14.24     | -21.00     | -6.90      | .005       |
| <b>2012-2016</b>              | -4.01      | -12.30     | 5.10       | .191       | 35.74      | 27.70      | 44.30      | .002       | <i>n/a</i> | <i>n/a</i> | <i>n/a</i> | <i>n/a</i> |
| <b>2016-2018</b>              | -17.54     | -38.10     | 9.80       | .102       | -1.47      | -18.80     | 19.50      | .773       | <i>n/a</i> | <i>n/a</i> | <i>n/a</i> | <i>n/a</i> |
| Financial assistance/concerns | -9.30      | -17.50     | -0.30      | <.05       | 13.40      | 1.80       | 26.30      | <.050      | -24.22     | -38.40     | -6.80      | .018       |
| 2012-2014                     | -24.45     | -55.40     | 28.00      | .149       | <i>n/a</i> |
| 2014-2018                     | -0.59      | -15.80     | 17.40      | .893       | <i>n/a</i> |
| 2012-2015                     | <i>n/a</i> | <i>n/a</i> | <i>n/a</i> | <i>n/a</i> | 30.99      | -6.3       | 83.2       | .074       | <i>n/a</i> | <i>n/a</i> | <i>n/a</i> | <i>n/a</i> |
| 2015-2018                     | <i>n/a</i> | <i>n/a</i> | <i>n/a</i> | <i>n/a</i> | -1.89      | -29.8      | 37.2       | .830       | <i>n/a</i> | <i>n/a</i> | <i>n/a</i> | <i>n/a</i> |
| Homelessness                  | -8.80      | -12.80     | -4.60      | <.05       | 20.80      | 10.40      | 32.20      | .003       | -16.85     | -23.80     | -9.30      | .003       |
| 2012-2016                     | -1.92      | -9.30      | 6.10       | .399       | <i>n/a</i> |
| 2016-2018                     | -21.10     | -38.40     | 1.10       | .054       | <i>n/a</i> |
| Practical/material assistance | -8.59      | -13.80     | -3.10      | .011       | 30.90      | 21.20      | 41.40      | <.050      | 9.68       | -32.60     | 78.40      | .646       |
| 2012-2015                     | <i>n/a</i> | <i>n/a</i> | <i>n/a</i> | <i>n/a</i> | 60.83      | 26.5       | 104.4      | .014       | <i>n/a</i> | <i>n/a</i> | <i>n/a</i> | <i>n/a</i> |
| 2015-2018                     | <i>n/a</i> | <i>n/a</i> | <i>n/a</i> | <i>n/a</i> | 6.58       | -16.1      | 35.5       | .371       | <i>n/a</i> | <i>n/a</i> | <i>n/a</i> | <i>n/a</i> |

\*a joinpoint was identified for webchat.

\*\* a joinpoint was identified for phone and webchat.

**Supplementary Table S4.** Number and percentage of contacts reporting at least one problem in each problem group across gender and age groups (n=449,814).

| <i>Counselling Problems</i>          | Total  |      | Phone  |      | Webchat |      | Email |      | Chi <sup>2</sup> | <i>p</i> -value |
|--------------------------------------|--------|------|--------|------|---------|------|-------|------|------------------|-----------------|
|                                      | N      | %    | N      | %    | N       | %    | N     | %    |                  |                 |
| <i>Male</i>                          |        |      |        |      |         |      |       |      |                  |                 |
| Emotional wellbeing & mental health  | 40,398 | 48.1 | 28,599 | 47.5 | 7506    | 48.9 | 4,293 | 49.7 | 28.12            | <.001           |
| Family relationships                 | 15,353 | 18.3 | 11,296 | 18.8 | 2,346   | 15.3 | 1,711 | 20.1 | 120.52           | <.001           |
| Social relationships                 | 18,162 | 21.6 | 12,813 | 21.3 | 3,777   | 24.6 | 1,572 | 18.4 | 135.54           | <.001           |
| Identity & self-concept              | 7,847  | 9.3  | 5,109  | 8.5  | 1,808   | 11.8 | 930   | 10.9 | 183.14           | <.001           |
| Child abuse & family violence        | 5,640  | 6.7  | 4,005  | 6.7  | 831     | 5.4  | 804   | 9.4  | 141.91           | <.001           |
| Violence & abuse (non-family)        | 6,513  | 7.7  | 4,604  | 7.7  | 1,247   | 8.1  | 662   | 7.8  | 3.76             | .153            |
| Offending, abusive & violent actions | 1,700  | 2.0  | 1,368  | 2.3  | 209     | 1.4  | 123   | 1.4  | 67.61            | <.001           |

|                                        |         |      |         |      |        |      |        |      |         |       |
|----------------------------------------|---------|------|---------|------|--------|------|--------|------|---------|-------|
| School, education & work               | 6,024   | 7.2  | 4,220   | 7.0  | 1,218  | 7.9  | 586    | 6.9  | 16.77   | <.001 |
| Potentially risky situations & actions | 2,921   | 3.5  | 2,378   | 4.0  | 352    | 2.3  | 191    | 2.2  | 143.83  | <.001 |
| Physical & sexual health/development   | 4,264   | 5.1  | 2,985   | 5.0  | 883    | 5.8  | 396    | 4.6  | 14.49   | <.001 |
| Basic needs assistance                 | 3,087   | 3.7  | 2,578   | 4.3  | 296    | 1.9  | 213    | 2.5  | 229.31  | <.001 |
| <i>Female</i>                          |         |      |         |      |        |      |        |      |         |       |
| Emotional well & mental health         | 200,752 | 56.8 | 106,280 | 55.0 | 57,412 | 58.6 | 37,060 | 59.5 | 579.22  | <.001 |
| Family relationships                   | 69,010  | 19.5 | 37,926  | 19.6 | 17,330 | 17.7 | 13,754 | 22.1 | 476.62  | <.001 |
| Social relationships                   | 68,998  | 19.5 | 39,139  | 20.2 | 19,475 | 19.9 | 10,384 | 16.7 | 390.48  | <.001 |
| Identity & self-concept                | 27,416  | 7.8  | 12,332  | 6.4  | 9,424  | 9.6  | 5,660  | 9.1  | 1141.6  | <.001 |
| Child abuse & family violence          | 27,091  | 7.7  | 15,646  | 8.1  | 6,000  | 6.1  | 5,445  | 8.7  | 483.9   | <.001 |
| Violence & abuse (non-family)          | 29,257  | 8.3  | 16,462  | 8.5  | 7,810  | 8.0  | 4,985  | 8    | 32.66   | <.001 |
| Offending, abusive & violent actions   | 2,372   | 0.7  | 1,631   | 0.8  | 460    | 0.5  | 281    | 0.5  | 191.34  | <.001 |
| School, education & work               | 21,250  | 6.0  | 11,809  | 6.1  | 6,561  | 6.7  | 2,880  | 4.6  | 294.76  | <.001 |
| Potentially risky situations & actions | 6,061   | 1.7  | 4,072   | 2.1  | 1,267  | 1.3  | 722    | 1.2  | 393.25  | <.001 |
| Physical & sexual health/development   | 19,136  | 5.4  | 10,628  | 5.5  | 5,806  | 5.9  | 2,702  | 4.3  | 191.98  | <.001 |
| Basic needs assistance                 | 7,865   | 2.2  | 5,733   | 3.0  | 1,340  | 1.4  | 792    | 1.3  | 1078.69 | <.001 |
| <i>Transgender or Gender Diverse</i>   |         |      |         |      |        |      |        |      |         |       |
| Emotional well & mental health         | 3,987   | 63.4 | 2,218   | 66.4 | 1,390  | 61.1 | 379    | 56.2 | 32.96   | <.001 |
| Family relationships                   | 826     | 13.1 | 501     | 15.0 | 236    | 10.4 | 89     | 13.2 | 25.35   | <.001 |
| Social relationships                   | 590     | 9.4  | 294     | 8.8  | 243    | 10.7 | 53     | 7.9  | 7.68    | .022  |
| Identity & self-concept                | 1,769   | 28.1 | 797     | 23.9 | 695    | 30.5 | 277    | 41.1 | 92.86   | <.001 |
| Child abuse & family violence          | 316     | 5.0  | 101     | 3.0  | 135    | 5.9  | 80     | 11.9 | 98.18   | <.001 |
| Violence & abuse (non-family)          | 268     | 4.3  | 128     | 3.8  | 123    | 5.4  | 17     | 2.5  | 13.83   | <.001 |
| Offending, abusive & violent actions   | 65      | 1.0  | 41      | 1.2  | 16     | 0.7  | 8      | 1.2  | 3.81    | .149  |
| School, education & work               | 249     | 4.0  | 135     | 4.0  | 93     | 4.1  | 21     | 3.1  | 1.42    | .492  |

|                                        |         |      |        |      |        |      |        |      |         |       |
|----------------------------------------|---------|------|--------|------|--------|------|--------|------|---------|-------|
| Potentially risky situations & actions | 55      | 0.9  | 27     | 0.8  | 24     | 1.1  | 4      | 0.6  | 1.64    | .441  |
| Physical & sexual health/development   | 153     | 2.4  | 91     | 2.7  | 55     | 2.4  | 7      | 1    | 6.71    | .035  |
| Basic needs assistance                 | 63      | 1.0  | 32     | 1.0  | 30     | 1.3  | 1      | 0.1  | 7.32    | .026  |
| <i>Children (5-12yrs)</i>              |         |      |        |      |        |      |        |      |         |       |
| Emotional wellbeing & mental health    | 21,345  | 39.1 | 11,851 | 35.6 | 4,769  | 44.8 | 4,725  | 44.5 | 442.63  | <.001 |
| Family relationships                   | 16,421  | 30.1 | 11,254 | 33.8 | 2,514  | 23.6 | 2,653  | 25   | 565.52  | <.001 |
| Social relationships                   | 8,733   | 16.0 | 4,658  | 14.0 | 2,135  | 20.0 | 1,940  | 18.3 | 268.89  | <.001 |
| Identity & self-concept                | 2,470   | 4.5  | 937    | 2.8  | 778    | 7.3  | 755    | 7.1  | 578.98  | <.001 |
| Child abuse & family violence          | 6,507   | 11.9 | 4,243  | 12.8 | 999    | 9.4  | 1,265  | 11.9 | 87.62   | <.001 |
| Violence & abuse (non-family)          | 9,727   | 17.8 | 6,391  | 19.2 | 1,810  | 17.0 | 1,526  | 14.4 | 134.87  | <.001 |
| Offending, abusive & violent actions   | 308     | 0.6  | 208    | 0.6  | 44     | 0.4  | 56     | 0.5  | 6.8     | .033  |
| School, education & work               | 2,103   | 3.9  | 1,252  | 3.8  | 451    | 4.2  | 400    | 3.8  | 5.08    | .079  |
| Potentially risky situations & actions | 494     | 0.9  | 295    | 0.9  | 84     | 0.8  | 115    | 1.1  | 5.5     | .064  |
| Physical & sexual health/development   | 1,574   | 2.9  | 847    | 2.5  | 419    | 3.9  | 308    | 2.9  | 55.38   | <.001 |
| Basic needs assistance                 | 399     | 0.7  | 317    | 1.0  | 37     | 0.3  | 45     | 0.4  | 63.7    | <.001 |
| <i>Teens (13-17yrs)</i>                |         |      |        |      |        |      |        |      |         |       |
| Emotional well & mental health         | 126,700 | 54.0 | 53,609 | 50.0 | 42,709 | 56.2 | 30,382 | 59.3 | 1411.63 | <.001 |
| Family relationships                   | 50,455  | 21.5 | 24,521 | 22.9 | 14,237 | 18.7 | 11,697 | 22.8 | 516.77  | <.001 |
| Social relationships                   | 42,872  | 18.3 | 19,299 | 18.0 | 15,191 | 20.0 | 8,382  | 16.3 | 281.29  | <.001 |
| Identity & self-concept                | 20,395  | 8.7  | 6,761  | 6.3  | 8,410  | 11.1 | 5,224  | 10.2 | 1453    | <.001 |
| Child abuse & family violence          | 20,242  | 8.6  | 10,674 | 10.0 | 4,960  | 6.5  | 4,608  | 9    | 673.7   | <.001 |
| Violence & abuse (non-family)          | 19,159  | 8.2  | 9,540  | 8.9  | 5,922  | 7.8  | 3,697  | 7.2  | 152.74  | <.001 |
| Offending, abusive & violent actions   | 2,245   | 1.0  | 1,489  | 1.4  | 453    | 0.6  | 303    | 0.6  | 387.54  | <.001 |
| School, education & work               | 13,914  | 5.9  | 6,339  | 5.9  | 5,036  | 6.6  | 2,539  | 5    | 153.58  | <.001 |
| Potentially risky situations & actions | 4,230   | 1.8  | 2,650  | 2.5  | 989    | 1.3  | 591    | 1.2  | 500.78  | <.001 |

|                                        |        |      |        |      |        |      |       |      |                     |       |
|----------------------------------------|--------|------|--------|------|--------|------|-------|------|---------------------|-------|
| Physical & sexual health/development   | 13,040 | 5.6  | 6,401  | 6.0  | 4,451  | 5.9  | 2,188 | 4.3  | 209.75              | <.001 |
| Basic needs assistance                 | 6,951  | 3.0  | 5,085  | 4.7  | 1,095  | 1.4  | 771   | 1.5  | 2171.8 <sub>9</sub> | <.001 |
| <i>Young adults (18-25yrs)</i>         |        |      |        |      |        |      |       |      |                     |       |
| Emotional well & mental health         | 99,565 | 62.0 | 73,043 | 60.9 | 19,269 | 64.5 | 7,253 | 66.8 | 250.83              | <.001 |
| Family relationships                   | 19,662 | 12.2 | 14,827 | 12.4 | 3,305  | 11.1 | 1,530 | 14.1 | 74.94               | <.001 |
| Social relationships                   | 37,260 | 23.2 | 29,068 | 24.2 | 6,322  | 21.2 | 1,870 | 17.2 | 357.73              | <.001 |
| Identity & self-concept                | 14,652 | 9.1  | 10,749 | 9.0  | 2,890  | 9.7  | 1,013 | 9.3  | 15.44               | <.001 |
| Child abuse & family violence          | 6,722  | 4.2  | 5,089  | 4.2  | 1,050  | 3.5  | 583   | 5.4  | 72.58               | <.001 |
| Violence & abuse (non-family)          | 7,774  | 4.8  | 5,717  | 4.8  | 1,513  | 5.1  | 544   | 5    | 8.45                | .066  |
| Offending, abusive & violent actions   | 1,640  | 1.0  | 1,385  | 1.2  | 193    | 0.6  | 62    | 0.6  | 84.42               | <.001 |
| School, education & work               | 11,859 | 7.4  | 8,807  | 7.3  | 2,442  | 8.2  | 610   | 5.6  | 77.02               | <.001 |
| Potentially risky situations & actions | 4,437  | 2.8  | 3,632  | 3.0  | 577    | 1.9  | 228   | 2.1  | 125.82              | .001  |
| Physical & sexual health/development   | 9,242  | 5.8  | 6,670  | 5.6  | 1,912  | 6.4  | 660   | 6.1  | 33.58               | <.001 |
| Basic needs assistance                 | 3,874  | 2.4  | 3,107  | 2.6  | 547    | 1.8  | 220   | 2    | 65.76               | <.001 |
